# Supplementary material for: Assessing the Implementation of Pharmacogenomic Panel-Testing in Primary Care in the Netherlands Utilizing a Theoretical Framework
Source: PubMed Central journal article supplement (PMC7141350; doi:10.3390/jcm9030814), 2020-03-17
Supplement: jcm-09-00814-s001.pdf [file jcm-09-00814-s001.pdf]

**Additional file 1: List of 12 genes and interacting 39 drugs which are implemented within the PREPARE study.**

| <b>Genes included in the PREPARE PGx panel (<i>n</i> = 12)</b> | <b>Interacting drugs for which initiation enables study participation (<i>n</i> = 39)</b>                                                                                                                         |
|----------------------------------------------------------------|-------------------------------------------------------------------------------------------------------------------------------------------------------------------------------------------------------------------|
| <i>CYP2B6</i>                                                  | Efavirenz                                                                                                                                                                                                         |
| <i>CYP2C9</i>                                                  | Acenocoumarol, phenprocoumon, warfarin, phenytoin,                                                                                                                                                                |
| <i>CYP2C19</i>                                                 | Clopidogrel, citalopram, escitalopram, sertraline, voriconazole,                                                                                                                                                  |
| <i>CYP2D6</i>                                                  | Flecainide, propafenone, codeine, tramadol, tamoxifen, paroxetine, venlafaxine, amitriptyline, clomipramine, doxepin, imipramine, nortriptyline, metoprolol, aripiprazole, haloperidol, pimozide, zuclopenthixol, |
| <i>CYP3A5</i>                                                  | Tacrolimus                                                                                                                                                                                                        |
| <i>DPYD</i>                                                    | Capecitabine, fluorouracil, tegafur,                                                                                                                                                                              |
| <i>F5</i>                                                      | oestrogen containing oral contraceptives                                                                                                                                                                          |
| <i>HLA-B (57:01)</i>                                           | Flucloxacillin                                                                                                                                                                                                    |
| <i>SLCO1B1</i>                                                 | Atorvastatin, simvastatin                                                                                                                                                                                         |
| <i>TPMT</i>                                                    | Azathioprine, mercaptopurine, thioguanine                                                                                                                                                                         |
| <i>UGT1A1</i>                                                  | Irinotecan,                                                                                                                                                                                                       |
| <i>VKORC1</i>                                                  | Acenocoumarol, phenprocoumon, warfarin                                                                                                                                                                            |

**Additional file 2: PGx recommendation specific survey following receipt of an actionable PGx recommendation (translated from the original in Dutch)**

When the drug-gene interaction was actionable:

1. Did you discuss this pharmacogenetic recommendation with the treating physician of this patient?
  - a. Yes
  - b. No
2. Who discussed the results of the PGx recommendation with the patient?
  - a. The pharmacist
  - b. The pharmacy technician
  - c. The treating physician
  - d. Result was to be reported at time of interview
3. Do you support the pharmacotherapy change agreed upon as a result of the PGx results?
  - a. Yes
  - b. No
4. Why do you not support this? (*when question 3 was answered with b*)

- a. *Open text*
- 5. Approximately how much time did you spend on handling this recommendation?  
..... minutes

**Additional file 3: Pharmacist survey regarding demographics and perceptions on PGx  
(translated from the original in Dutch)**

**Part 1. Pharmacist**

1. Do you generally manage the pharmacogenetic recommendation yourself?
  - a. Yes
  - b. No
  - c. I don't know
2. What is your age?
3. What is your gender?
  - a. Male
  - b. Female
  - c. Other / I don't know
4. How many years of work experience do you have as a community pharmacist?
5. What is your function in the pharmacy? (select one)
  - a. Managing Pharmacist
  - b. Supporting Pharmacist
  - c. Community pharmacist specialist in training
  - d. Other
  - e. I don't know
6. How would you estimate your knowledge of pharmacogenetics?
  - a. 1 – I don't know anything about it
  - b. 2
  - c. 3
  - d. 4
  - e. 5 – I know something about it
7. To what extent do you think preventive pharmacogenetic testing is effective?
  - a. 1 – Not at all effective
  - b. 2

- c. 3
  - d. 4
  - e. 5 – Very effective
8. Did you complete the U-PGx elearning?
- a. No
  - b. Yes, partly (please fill in question 9)
  - c. Yes, completely
  - d. I don't know
9. When partly, what section of the e-learning did you complete?
- a. The information videos
  - b. The case reports
  - c. Parts of both sections

## **Part 2. Pharmacy**

1. How many patients does your pharmacy serve?
- a. < 5,000
  - b. 5,000 – 7,500
  - c. 7,500 – 10,000
  - d. > 10,000
  - e. I don't know
2. Is the pharmacy part of a chain or partnership with other pharmacies?
- a. No, completely independent
  - b. Yes, a chain
  - c. Yes, a franchise
  - d. Yes, a pharmacy group
  - e. I don't know
3. How many pharmacists work in your pharmacy?
- a. ≤ 1 FTE
  - b. > 1 en ≤ 2 FTE
  - c. > 2 en ≤ 3 FTE
  - d. > 3 FTE
  - e. I don't know
4. Is the pharmacy located in a health center?

- a. Yes
- b. No
- c. I don't know

**Additional file 4: Interview template semi-structured interview (translated from the original in Dutch)**

- To date you have received ... actionable recommendations, of which ... were adhered to, is this correct?
  - How do you generally handle the receipt and implementation of a recommendation?
  - What do you think about how the handling process generally works? (from receipt of the recommendation until the implementation – so discussion with the treating physician, looking up information etc.)
- ➔ Ask subsequent questions about mentioned parts of the process

|                                   |                                                                                                                                                                                                                                                                                                                                                                                                                                                        |
|-----------------------------------|--------------------------------------------------------------------------------------------------------------------------------------------------------------------------------------------------------------------------------------------------------------------------------------------------------------------------------------------------------------------------------------------------------------------------------------------------------|
| Knowledge                         | <p>Do you think you have enough knowledge about pharmacogenetics?<br/>Would you like to learn more about it? How?</p> <p>Are you aware of the evidence for pharmacogenetics and do you think that is enough?</p> <p>Do you know what is expected of you when handling the recommendation?</p>                                                                                                                                                          |
| Skills                            | <p>Do you know how to apply for a pharmacogenetic test outside the context of the study?</p>                                                                                                                                                                                                                                                                                                                                                           |
| Professional role                 | <p>Whose responsibility is it to handle the recommendation?<br/>And to do a possible follow up?</p>                                                                                                                                                                                                                                                                                                                                                    |
| Belief in capability              | <p>How confident are you in handling the recommendation?<br/>So, for example, in consultation with the doctor, or passing it on to a patient?</p>                                                                                                                                                                                                                                                                                                      |
| Optimism                          | <p>What is your attitude towards pharmacogenetics in general? Are you optimistic about it?</p>                                                                                                                                                                                                                                                                                                                                                         |
| Belief in consequences            | <p>To what extent is following the recommendation pleasant or interesting for yourself?</p> <p>Does following the recommendation give you a satisfied feeling?<br/>Do you think pharmacogenetics and following the guidelines have a positive effect on the treatment of patients?<br/>Do you think the patients appreciate it?</p> <p>What do you think this does with your relationship with the doctor? Does it give better cooperation or not?</p> |
| Intentions                        | <p>How do you think things will go after the study ends?<br/>Are you going to also apply pharmacogenetic testing outside the context of the study?</p>                                                                                                                                                                                                                                                                                                 |
| Priority / Time                   | <p>How often does something else on your agenda have a higher priority or urgency than handling a pharmacogenetic recommendation?<br/>Which part of handling recommendation takes the most time? How do you think this could be more efficient?</p>                                                                                                                                                                                                    |
| Characteristics of the innovation | <p>Can pharmacogenetics fit into your daily practice? How do you do this?</p>                                                                                                                                                                                                                                                                                                                                                                          |

|                                    |                                                                                                                                                                                                                                                                                                                                            |
|------------------------------------|--------------------------------------------------------------------------------------------------------------------------------------------------------------------------------------------------------------------------------------------------------------------------------------------------------------------------------------------|
|                                    | You have indicated that handling the recommendation takes on average ... minutes, what do you think of this time spent?                                                                                                                                                                                                                    |
| Socio-political context            | Is there enough support for pharmacogenetics from the government and, for example, insurance companies?<br>Do you feel supported by the chain/pharmacy group/to participate in this study and to apply pharmacogenetic testing outside of it?                                                                                              |
| Patients                           | What is your impression of patients' opinions on pharmacogenetic testing?<br>Do you feel that patients still need something extra?                                                                                                                                                                                                         |
| Sources                            | Do you know where you can go for information on pharmacogenetics?<br>What do you think of the possibilities within the AIS with regard to pharmacogenetics?                                                                                                                                                                                |
| Social and professional influences | Do you ever talk to pharmacists about pharmacogenetics? Do they agree with you or do they have a completely different opinion? How does that affect your opinion?<br>Does it make a difference with which doctor you should take the recommendation? Does that influence the outcome of the intervention?<br>How would you like to see it? |
| Emotions                           | Does the handling of the pharmacogenetic recommendation ever cause emotions in you? For example frustration, nervousness or optimism and a good feeling? In which cases is that, why is that and how could it be prevented?                                                                                                                |
| Behavior                           | If you were to apply a pharmacogenetic test outside the study, in which situation would you do that? And in which patient groups?<br>How do you solve it if a patient or doctor does not want to cooperate with the intervention?<br>How do you solve it if there is not enough time for pharmacogenetic testing?                          |
| Source of behavior                 | Is pharmacogenetic testing and recommendation handling in your daily workflow? Do you think this is also the case outside the context of the study?<br>Do you think this will ever be the case, what would make it happen?                                                                                                                 |

#### Completion:

- What are the reasons why you would (possibly) not follow the recommendation?
- When you look back on everything that we have now discussed, what are the most important points for you regarding the implementation of pharmacogenetics?
- Ask more specifically for facilitators and barriers
- Thank for time and participation
